# Supplementary material for: An novel role of sphingosine kinase-1 (SPHK1) in the invasion and metastasis of esophageal carcinoma
Source: J Transl Med. 2011 Sep 22;9:157. doi: 10.1186/1479-5876-9-157 (PMC3186754; doi:10.1186/1479-5876-9-157)
Supplement: Additional file 1 — The gene expression profiles of EC9706 and EC9706-P4 were analyzed by microarrays. Between these cell lines, 124 genes were differentially expressed, including 71 upregulated genes and 53 downregulated genes in EC9706-P4 relative to EC9706 (cutoff, fold ≥ 2.0). [file 1479-5876-9-157-S1.XLS]

## Sheet: Sheet1
124 differentially expressed genes
Name	Cy5 Intensity (06P4)	Cy3 Intensity (06P0)	ratio	Description
ARMC7	865	3069	0.213489	Hypothetical protein FLJ22160
MGC21981	3055	10440	0.229401	Homo sapiens, clone MGC:21981 IMAGE:4396073, mRNA, complete cds
INSIG1	2834	7674	0.23685	Insulin induced gene 1
A2M	878	2503	0.257194	Alpha-2-macroglobulin
CRYAB	3331	10417	0.262258	Crystallin, alpha B
GMPR	4072	10141	0.293893	Guanosine monophosphate reductase
HAO2	289	1872	0.299982	Hydroxyacid oxidase 2 (long chain)
FDFT1	19923	46389	0.302456	Farnesyl-diphosphate farnesyltransferase 1
HMGCS1	7099	16785	0.309859	3-hydroxy-3-methylglutaryl-Coenzyme A synthase 1 (soluble)
DHCR7	10256	24777	0.325534	7-dehydrocholesterol reductase
FHL5	391	1518	0.33138	Activator of CREM in testis
IPO7	1251	2875	0.335663	RAN binding protein 7
P2RY6	9662	20894	0.343876	Pyrimidinergic receptor P2Y, G-protein coupled, 6
SERPINI1	819	1960	0.370642	Serine (or cysteine) proteinase inhibitor, clade I (neuroserpin), member 1
C20orf110	4619	9846	0.39122	Chromosome 20 open reading frame 110
NGFR	1219	2719	0.3947	Nerve growth factor receptor (TNFR superfamily, member 16)
ASB9	1923	4246	0.400932	DKFZP564L0862 protein
IDI1	17144	37026	0.402115	Isopentenyl-diphosphate delta isomerase
NR4A3	1012	2075	0.409629	Nuclear receptor subfamily 4, group A, member 3
HSD17B7	2309	4661	0.411596	Hydroxysteroid (17-beta) dehydrogenase 7
HAB1	1430	3161	0.415804	B1 for mucin
CCL2	588	1780	0.416453	Small inducible cytokine A2 (monocyte chemotactic protein 1)
RAB5C	12395	25932	0.421498	RAB5C, member RAS oncogene family
ADAMTS1	3253	5829	0.433413	A disintegrin-like and metalloprotease (reprolysin type) with thrombospondin type 1 motif, 1
HSD17B3	1569	2990	0.434012	Hydroxysteroid (17-beta) dehydrogenase 3
HMGCR	4886	9584	0.439922	3-hydroxy-3-methylglutaryl-Coenzyme A reductase
CART1	1398	2705	0.441242	Cartilage paired-class homeoprotein 1
APOB	722	1684	0.444225	Apolipoprotein B (including Ag(x) antigen)
SC4MOL	1711	4569	0.446045	Sterol-C4-methyl oxidase-like
LPIN1	2217	4007	0.448105	Lipin 1
PEG10	1500	2820	0.449352	Paternally expressed 10
ANKRD2	694	1541	0.452083	Ankyrin repeat domain 2 (stretch responsive muscle)
FLJ10901	4886	8392	0.452758	Hypothetical protein FLJ10901
GPR37	1831	3368	0.453301	G protein-coupled receptor 37 (endothelin receptor type B-like)
TXNIP	2268	4476	0.453553	Thioredoxin interacting protein
SCD	8157	16256	0.460952	Stearoyl-CoA desaturase (delta-9-desaturase)
FLJ14525	2328	3975	0.462341	Hypothetical protein FLJ14525
EGFL5	2503	4292	0.47353	EGF-like-domain, multiple 5
MAGED2	22651	38880	0.474166	Melanoma antigen, family D, 2
FLJ12442	4265	7753	0.474392	Hypothetical protein FLJ12442
FAM46B	782	1564	0.476175	Hypothetical protein MGC16491
FGFBP1	1283	2466	0.479319	Heparin-binding growth factor binding protein
NPM3	1610	3115	0.482337	Nucleophosmin/nucleoplasmin, 3
NSDHL	6400	10610	0.485864	NAD(P) dependent steroid dehydrogenase-like; H105e3
SORCS2	1665	2930	0.488244	VPS10 domain receptor protein
DTX4	3759	6625	0.488474	KIAA0937 protein
ACAT2	10016	25325	0.49029	Acetyl-Coenzyme A acetyltransferase 2 (acetoacetyl Coenzyme A thiolase)
CYR61	18299	30161	0.490581	Cysteine-rich, angiogenic inducer, 61
	915	1835	0.494867	Human clone 23548 mRNA sequence
LOC144997	1058	2130	0.496004	Homo sapiens mRNA; cDNA DKFZp761I071 (from clone DKFZp761I071)
KRT17	24441	40302	0.496394	Keratin 17
TM7SF2	1472	2521	0.497513	Transmembrane 7 superfamily member 2
SERHL	680	1757	0.499644	Kraken-like
CLDN1	4329	2434	2.00951	Claudin 1
PIM1	5392	2797	2.01115	Pim-1 oncogene
SPTB	1918	1205	2.01512	Spectrin, beta, erythrocytic (includes spherocytosis, clinical type I)
	6510	2751	2.02242	Homo sapiens mRNA; cDNA DKFZp667D095 (from clone DKFZp667D095)
SE57-1	7983	4380	2.03954	CTCL tumor antigen se57-1
FOXF2	5134	2567	2.05834	Forkhead box F2
CPT1A	4582	1647	2.07499	Carnitine palmitoyltransferase I, liver
FLJ12221	1789	975	2.09566	Hypothetical protein FLJ12221
ITGB4	22118	11475	2.09573	Integrin, beta 4
KIAA0855	22904	12363	2.09683	Golgin-67
IER3	9317	4656	2.10859	Immediate early response 3
FLJ22761	2820	1463	2.11701	Hypothetical protein FLJ22761
MET	6409	2861	2.12425	Met proto-oncogene (hepatocyte growth factor receptor)
ARF4L	2562	1256	2.12768	ADP-ribosylation factor 4-like
ADAM12	4173	2042	2.13445	A disintegrin and metalloproteinase domain 12 (meltrin alpha)
LOXL2	5397	2599	2.1367	Lysyl oxidase-like 2
KRT15	2056	1076	2.14933	Keratin 15
NKX3A	4835	2286	2.14943	NK3 transcription factor homolog A (Drosophila)
DUSP1	11516	5042	2.15496	Dual specificity phosphatase 1
MARCKSL1	5309	2599	2.1555	Macrophage myristoylated alanine-rich C kinase substrate
ADM	17434	8144	2.15813	Adrenomedullin
BF	3598	1955	2.16122	B-factor, properdin
LOC153218	6750	3165	2.1664	Homo sapiens cDNA FLJ10658 fis, clone NT2RP2006052
TERF2	6529	2815	2.16927	Telomeric repeat binding factor 2
ITGA2	2374	906	2.17014	Integrin, alpha 2 (CD49B, alpha 2 subunit of VLA-2 receptor)
TDE2	22987	11351	2.17204	Homo sapiens, clone MGC:9709 IMAGE:3850147, mRNA, complete cds
AXL	11737	5424	2.1894	AXL receptor tyrosine kinase
TIMP3	24230	8314	2.2072	Tissue inhibitor of metalloproteinase 3 (Sorsby fundus dystrophy, pseudoinflammatory)
KIAA1265	4343	2296	2.23458	KIAA1265 protein
ZIC2	3561	1523	2.23712	Zic family member 2 (odd-paired homolog, Drosophila)
FLJ20186	1734	952	2.24222	Hypothetical protein FLJ20186
AKAP12	14631	7500	2.27301	A kinase (PRKA) anchor protein (gravin) 12
LOC338769	12874	6151	2.29633	Homo sapiens, clone IMAGE:4245930, mRNA
C10orf116	2061	1145	2.29863	Adipose specific 2
DKK1	44650	21588	2.31606	Dickkopf homolog 1 (Xenopus laevis)
TFPI	45092	19495	2.32587	Tissue factor pathway inhibitor (lipoprotein-associated coagulation inhibitor)
SAT	40228	18915	2.34536	Spermidine/spermine N1-acetyltransferase
PITPNC1	4679	1228	2.35721	Retinal degeneration B beta
TFF2	2378	1136	2.35864	Trefoil factor 2 (spasmolytic protein 1)
RGS2	11342	5185	2.36113	Regulator of G-protein signalling 2, 24kD
	2627	1288	2.3794	Homo sapiens clone 25194 mRNA sequence
TFPI2	3004	1164	2.48157	Tissue factor pathway inhibitor 2
TGM2	26544	10955	2.5208	Transglutaminase 2 (C polypeptide, protein-glutamine-gamma-glutamyltransferase)
CGA	67909	29737	2.54852	Glycoprotein hormones, alpha polypeptide
SERPINE1	2134	1118	2.5704	Serine (or cysteine) proteinase inhibitor, clade E (nexin, plasminogen activator inhibitor type 1),
SLC20A1	32309	14305	2.58738	Solute carrier family 20 (phosphate transporter), member 1
	84920	31794	2.58927	Homo sapiens cDNA: FLJ22182 fis, clone HRC00953
LCN2	18993	5355	2.5923	Lipocalin 2 (oncogene 24p3)
GPCR5A	19085	6680	2.60105	Retinoic acid induced 3
CDKN1A	4941	1964	2.60844	Cyclin-dependent kinase inhibitor 1A (p21, Cip1)
LOC57228	1707	450	2.68028	Hypothetical protein from clone 643
CYBA	34688	15151	2.71605	Cytochrome b-245, alpha polypeptide
TM4SF3	4495	2029	2.71928	Transmembrane 4 superfamily member 3
MFAP5	2618	1104	2.7917	Microfibril-associated glycoprotein-2
AHNAK	2006	860	2.79677	AHNAK nucleoprotein (desmoyokin)
	2236	805	2.80484	Homo sapiens, clone MGC:23936 IMAGE:3838595, mRNA, complete cds
ANGPTL4	7578	3326	2.84233	Angiopoietin-like 4
CMG2	7090	2907	2.92134	Homo sapiens mRNA; cDNA DKFZp586P1622 (from clone DKFZp586P1622)
FMNL2	4881	2042	3.0749	KIAA1902 protein
SPHK1	5659	1955	3.08627	Sphingosine kinase 1
UBD	7159	2438	3.09245	Diubiquitin
CLECSF2	5903	2337	3.13254	C-type (calcium dependent, carbohydrate-recognition domain) lectin, superfamily member 2 (activation
LOC58489	10684	4187	3.14289	Hypothetical protein from EUROIMAGE 588495
PHLDA1	5194	1449	3.24216	Homo sapiens cDNA: FLJ22528 fis, clone HRC12825
EREG	2305	708	3.27392	Epiregulin
DUSP6	2871	943	3.55773	Dual specificity phosphatase 6
FST	4845	1550	3.59678	Follistatin
IL1B	9878	3230	3.60417	Interleukin 1, beta
CD44	20332	6993	3.72257	CD44 antigen (homing function and Indian blood group system)
PSCA	81400	28334	3.78587	Prostate stem cell antigen
IGFBP1	7228	1343	5.24983	Insulin-like growth factor binding protein 1
